# Supplementary material
Source: publisher figshare collection journal article supplement (https://acs.figshare.com/ndownloader/files/5321986)
Supplement: Supplementary file 1 [file 5321986]

## SUPPORTING INFORMATION

### Ion Permeation through Silica Coating of Silver Nanoparticles Functionalized with 2-Mercaptoethanesulfonate Anions: SiO<sub>2</sub>-Encapsulated SERS Probes for Metal Cations

Piotr Piotrowski and Jolanta Bukowska\*

Department of Chemistry, University of Warsaw, Pasteur Street 1, 02-093 Warsaw, Poland

\*corresponding author

e-mail: jbukow@chem.uw.edu.pl

phone: +48 22 55 26 402

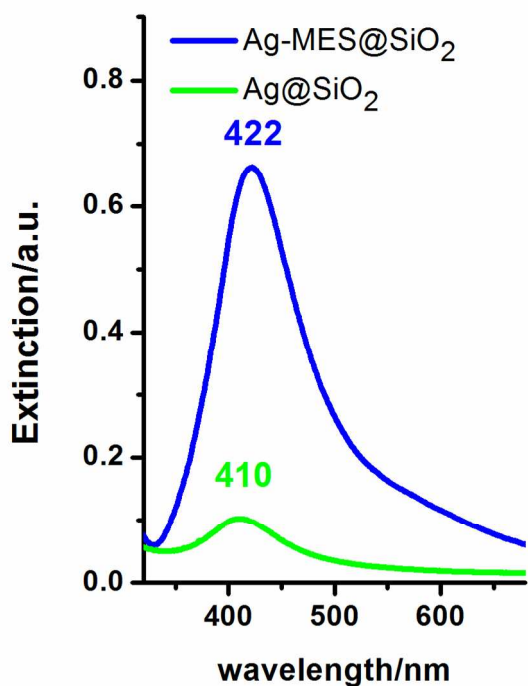

Figure S1. Comparison between the extinction spectra of Ag@SiO<sub>2</sub> obtained with use of MES-coated Ag nanoparticles (Ag-MES@SiO<sub>2</sub>, blue spectrum) and MES-uncoated Ag nanoparticles (Ag@SiO<sub>2</sub>, green spectrum).

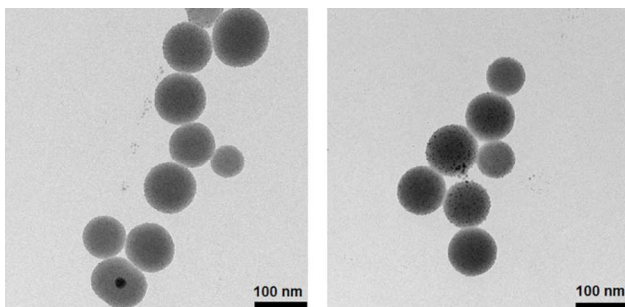

Figure S2. Sample TEM images of Ag@SiO<sub>2</sub> NPs prepared with Ag nanoparticles uncoated with MES. The sample consists of SiO<sub>2</sub> beads with rare Ag cores which look significantly smaller (picture on the left, in the bottom left corner). SiO<sub>2</sub> are covered with small Ag nanoparticles etched with ammonia.

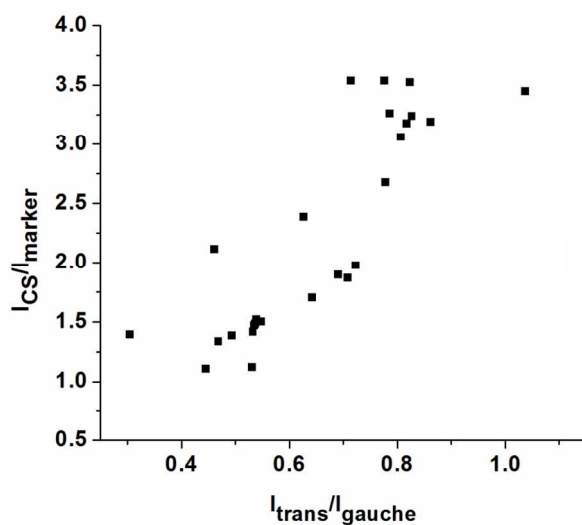

Figure S3. Intensity ratio of C-SO<sub>3</sub><sup>-</sup> vibrational band in the SERS spectrum of MES to the marker band at 1035 cm<sup>-1</sup> plotted against the intensity ratio of C-S bands for trans and gauche conformers for different samples. The plot shows that these two values are proportional. Since a change of  $I_{trans}/I_{gauche}$  indicates structural changes in the monolayer, such a relation suggests that  $I_{CS}/I_{marker}$  is also influenced by the structure of the monolayer.

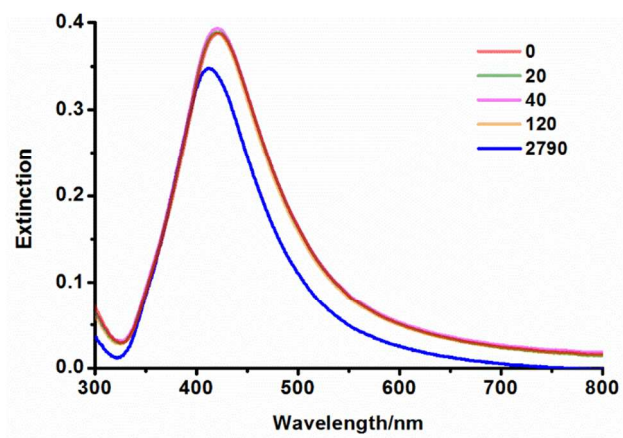

Figure S4. Temporal changes in UV-Vis spectra of Ag-MES@SiO<sub>2</sub>, time after the synthesis in minutes is given in the legend.
